# Supplementary material for: Nonlinear relationship between phenotypic age acceleration and testosterone deficiency in the US population: A cross-sectional NHANES study
Source: Research Square preprint supplement (doi:10.21203/rs.3.rs-5535673/v1), 2024-12-03
Supplement: Supplementary file 1 [file 575e3aab0cae357de05fce45.docx]

| Models | Per-unit increase | | |
| --- | --- | --- | --- |
| **OR (95%CI)** | **P value** | |
| Model I | | | |
| One line effect | -5.24 (-7.18, -3.30) | | <0.0001 |
| Model II | | | |
| Turning point (K) | -14.15 | | |
| NHHR < K | 28.63 (6.67, 50.60) | | 0.0107 |
| NHHR ≥ K | -6.15 (-8.17, -4.13) | | <0.0001 |
| P value for LRT test* | 0.002 | | |

**Table S2.** Threshold effect analysis of the PhenoAgeAccel and testosterone level. Data were presented as OR (95% CI) P value. * P<0.05 indicates that model II is significantly different from Model I. Model I, linear analysis; Model II, non-linear analysis. CI, confidence interval; OR, odds ratio; LRT, logarithm likelihood ratio test; PhenoAgeAccel: phenotypic age acceleration; PIR: Poverty Income Ratio; BMI: Body Mass Index; DM: Diabetes Mellitus; CVD: Cardiovascular Disease.

Adjusted for: age, race; education level, marital status, PIR, BMI, smoking status, alcohol consumption, hypertension; hypercholesterolemia, DM and CVD.
