# Supplementary material for: Nonlinear relationship between phenotypic age acceleration and testosterone deficiency in the US population: A cross-sectional NHANES study
Source: Research Square preprint supplement (doi:10.21203/rs.3.rs-5535673/v1), 2024-12-03
Supplement: Supplementary file 2 [file c9e118cc8207f104b5186906.docx]

| **Exposure** | **Statistics (N=1420)** | **OR (95% CI)** | **P value** |
| --- | --- | --- | --- |
| **Age (years), tertile** |  |  |  |
| 12 - 31 | 465 (32.75%) | 1.0 (Reference) |  |
| 32 - 56 | 462 (32.54%) | 1.34 (0.95, 1.87) | 0.0941 |
| 57 - 80 | 493 (34.72%) | 2.00 (1.46, 2.76) | <0.0001 |
| **Age, continuous** | 43.47 ± 19.71 | 1.01 (1.01, 1.02) | <0.0001 |
| **Race (%)** |  |  |  |
| Non-Hispanic White | 237 (16.69%) | 1.0 (Reference) |  |
| Non-Hispanic Black | 189 (13.31%) | 1.04 (0.65, 1.65) | 0.8815 |
| Mexican American | 479 (33.73%) | 1.18 (0.81, 1.72) | 0.3843 |
| Other Hispanic | 290 (20.42%) | 0.93 (0.61, 1.43) | 0.7563 |
| Other | 225 (15.85%) | 0.69 (0.43, 1.11) | 0.1256 |
| **Education level (%)** |  |  |  |
| Less than high school | 286 (24.72%) | 1.0 (Reference) |  |
| High school | 268 (23.16%) | 1.51 (1.00, 2.29) | 0.0504 |
| More than high school | 603 (52.12%) | 1.39 (0.97, 1.99) | 0.0743 |
| **Marital status (%)** |  |  |  |
| Living with partner | 771 (66.64%) | 1.0 (Reference) |  |
| Living alone | 386 (33.36%) | 0.85 (0.63, 1.15) | 0.2856 |
| **PIR (%)** |  |  |  |
| <1.3 | 416 (32.42%) | 1.0 (Reference) |  |
| 1.3-3.5 | 515 (40.14%) | 0.77 (0.55, 1.06) | 0.1035 |
| ≥3.5 | 352 (27.44%) | 1.07 (0.76, 1.50) | 0.6877 |
| **BMI (%)** |  |  |  |
| <25 | 496 (35.23%) | 1.0 (Reference) |  |
| 25-30 | 461 (32.74%) | 2.26 (1.53, 3.33) | <0.0001 |
| ≥30 | 451 (32.03%) | 6.10 (4.24, 8.77) | <0.0001 |
| **Smoking status** |  |  |  |
| Never | 567 (46.36%) | 1.0 (Reference) |  |
| Former | 357 (29.19%) | 1.39 (1.24, 1.55) | <0.0001 |
| Current | 299 (24.45%) | 0.82 (0.55, 1.20) | 0.3016 |
| **Alcohol consumption** |  |  |  |
| No | 234 (20.51%) | 1.0 (Reference) |  |
| Yes | 907 (79.49%) | 0.85 (0.60, 1.19) | 0.3358 |
| **Hypertension** |  |  |  |
| No | 980 (69.01%) | 1.0 (Reference) |  |
| Yes | 440 (30.99%) | 1.87 (1.44, 2.44) | <0.0001 |
| **Hyperlipidemia** |  |  |  |
| No | 939 (66.13%) | 1.0 (Reference) |  |
| Yes | 481 (33.87%) | 2.05 (1.58, 2.66) | <0.0001 |
| **DM** |  |  |  |
| No | 1221 (85.99%) | 1.0 (Reference) |  |
| Yes | 199 (14.01%) | 2.55 (1.85, 3.52) | <0.0001 |
| **CVD** |  |  |  |
| No | 949 (66.83%) | 1.0 (Reference) |  |
| Yes | 471 (33.17%) | 1.89 (1.45, 2.45) | <0.0001 |
| **HDL-C (mg/dL)** | 50.80 ± 15.43 | 0.97 (0.96, 0.98) | <0.0001 |
| **TC (mg/dL)** | 180.68 ± 42.34 | 1.00 (1.00, 1.00) | 0.7482 |
| **PhenoAgeAccel, tertile** |  |  |  |
| -19.57 – (-9.64) | 351 (25.04%) | 1.0 (Reference) |  |
| -9.64 – (-5.89) | 350 (24.96%) | 1.51 (0.97, 2.37) | 0.0699 |
| -5.89 – (-1.56) | 350 (24.96%) | 2.35 (1.54, 3.60) | <0.0001 |
| -1.56 – 17.26 | 351 (25.04%) | 4.81 (3.21, 7.21) | <0.0001 |
| **PhenoAgeAccel, continuous** | -5.42 ± 4.98 | 1.13 (1.10, 1.16) | <0.0001 |

**Table S1.** Univariate analysis of factors associated with testosterone deficiency (n=1420). Data are presented as mean ± SD for continuous variables and n (%) for categorical variables.

OR: Odds Ratio; CI: Confidence Interval; PhenoAgeAccel: Phenotypic Age Acceleration; TC：Total Cholesterol; LDL-C: Low-Density Lipoprotein Cholesterol; PIR: Poverty Income Ratio; BMI: Body Mass Index; DM: Diabetes Mellitus; CVD: Cardiovascular Disease; TC: Total cholesterol.
